# Supplementary material
Source: PubMed Central journal article supplement (PMC3863798)
Supplement: mt2013192x1.pdf [file mt2013192x1.pdf]

Supp. Figure 1

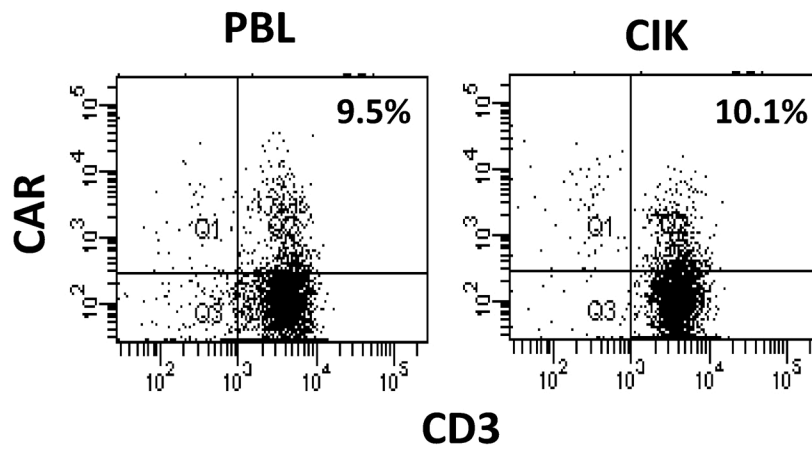

Supp. Fig. 1

T cells and CIK cells express the same CAR with similar efficacy.

PBL and CIK cells from the same donor were CAR engineered CAR expression on T cells was monitored by flow cytometry utilizing anti-CD3 FITC and anti-human IgG -PE antibodies, respectively. A representative experiment is demonstrated. Numbers indicate CAR CD3<sup>+</sup> cells.

Supp. Figure 2

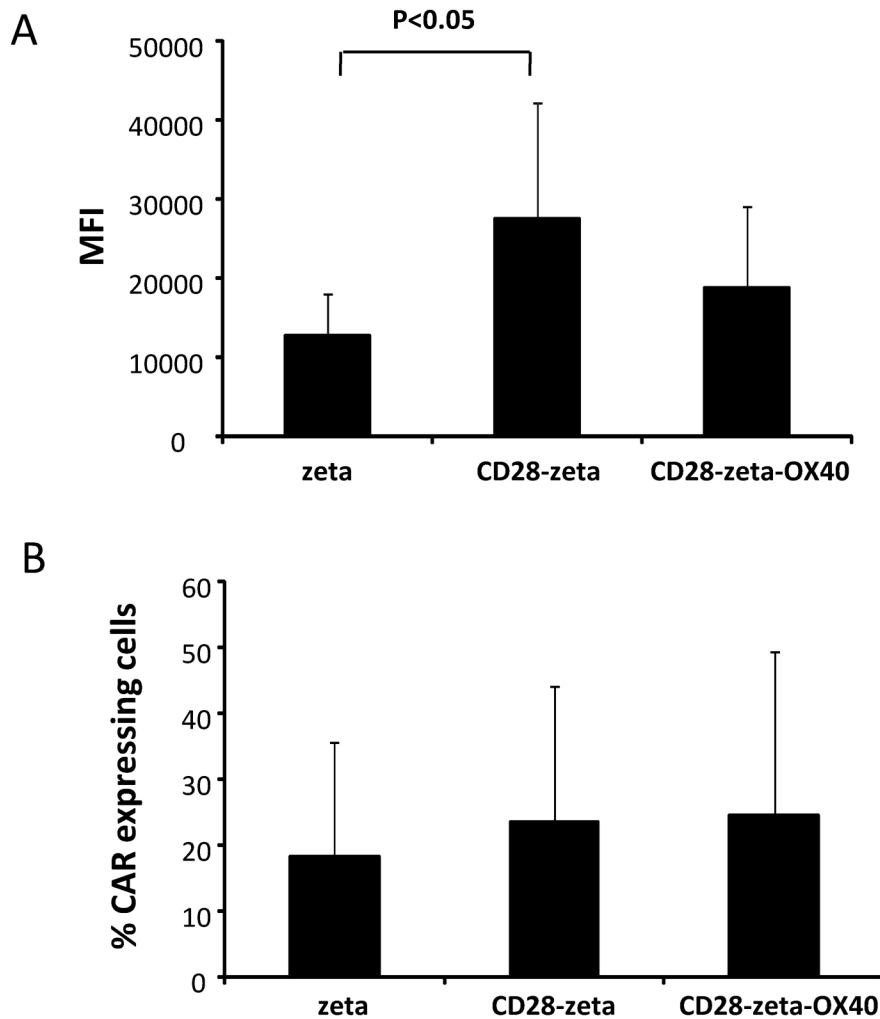

Supp. Fig. 2

Expression analyses of different CARs in CIK cells.

CIKs of different healthy donors were CAR engineered and analysed for CAR expression 7-14 days post transduction by flow cytometry. Gates were set around CAR cells and the mean fluorescence (mfi) was determined. (A) Mean fluorescence of CAR CIK cells. (B) The number of CAR CIK cells.

Supp. Figure 3

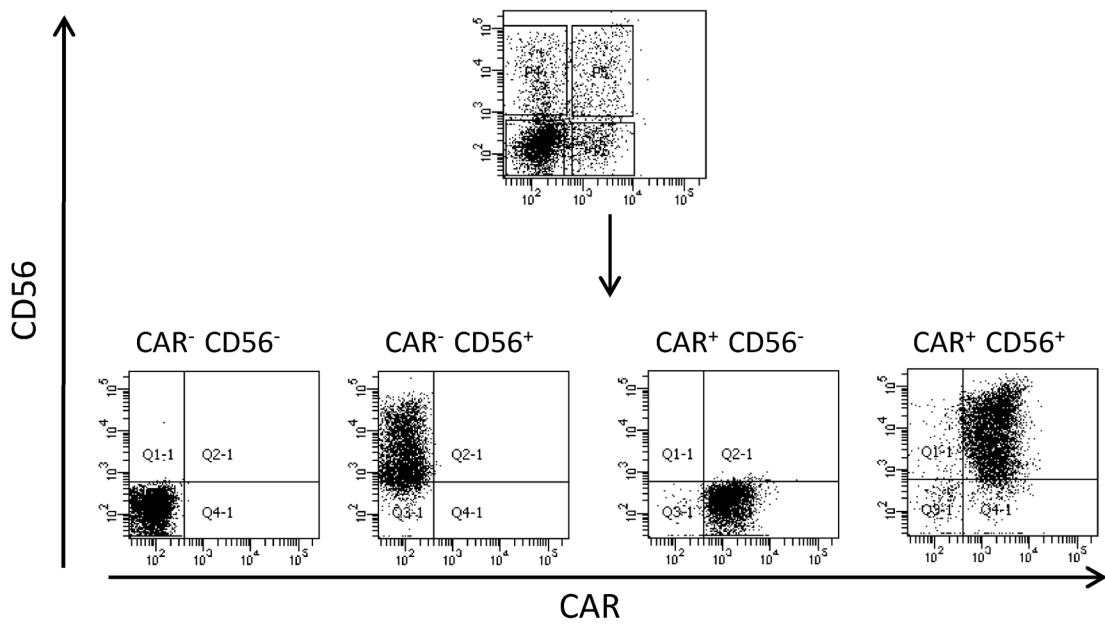

Supp. Fig. 3

Isolation of CAR CIK cell subpopulations

CIK cells were engineered with the CAR and sorted by flow cytometry into the CD56<sup>+</sup> and CD56<sup>-</sup> cell populations with and without CAR.
